# Supplementary material for: Revisiting the electronic structure of N2-bound cAAC-borylene at the CASSCF level: a detailed bonding picture of borylene–N2 interaction
Source: Royal Society of Chemistry journal article supplement (doi:10.1039/d3dt01155k), 2023-01-01
Supplement: d3dt01155k1.pdf [file d3dt01155k1.pdf]

## Supporting Information

### Revisiting the Electronic Structure of N<sub>2</sub>-Bound cAAC-Borylene at the CASSCF Level: A Detailed Bonding Picture of Borylene-N<sub>2</sub> Interaction

Susovon Ghosh, Akhil Bhardwaj and Bhaskar Mondal\*

School of Chemical Sciences, Indian Institute of Technology Mandi, Himachal Pradesh 175075, India

#### 1. Geometrical Parameters

**Table S1.** Comparison between key geometrical parameters (distances R and angles) calculated at the B3LYP/[def2-TZVP+def2-SVP] level of theory and that reported from the crystal structure of complexes **1**, **2**, and **3**.

|                     | <b>1</b><br>(S = 0) |              | <b>2</b><br>(S = 0) |              | <b>3</b><br>(S = 1) |              |
|---------------------|---------------------|--------------|---------------------|--------------|---------------------|--------------|
|                     | B3LYP               | Experimental | B3LYP               | Experimental | B3LYP               | Experimental |
| R <sub>NN</sub> (Å) | 1.22                | 1.25         | 1.28                | 1.30         | 1.39 Å              | 1.40         |
| R <sub>BN</sub>     | 1.41                | 1.42         | 1.48                | 1.48         | 1.41                | 1.42         |
|                     | 1.39                | 1.40         | 1.48                | 1.48         | 1.42                | 1.43         |
| ∠BNNB (°)           | 110.7               | 113.0        | 177.4               | 174.1        | 165.2               | 168.5        |

#### 2. Fractional Orbital Density (FOD) Analysis

A proper electronic structure treatment of the non-dynamic or static correlation is the key to determining the electronic structure of highly conjugated  $\pi$  systems. Fractional Orbital Density (FOD)<sup>1,2</sup> plots provide an efficient way to quantify the extent of non-dynamic correlation present in conjugated systems. Here, we have performed FOD analysis of cAAC-

Borylene bound N<sub>2</sub> (**1** and **5**), CO (**4**), and related complexes (**2**, **3**) complexes to determine the extent of multiconfigurational character present in them. All FOD calculations were performed at the B3LYP/def2-TZVP level of theory. FOD plots along with the FOD index ( $N_{\text{FOD}}$ ) are presented in Figure S1. To account for the dependence of FOD and  $N_{\text{FOD}}$  on the Hartree-Fock (HF) exchange, TPSS density functional with 0% HF exchange and B3LYP density functional having 20% HF exchange were employed. It is to be noted that a large  $N_{\text{FOD}}$  with delocalized FOD estimated using any density functional with significant HF exchange (e.g., B3LYP, 20% HF exchange) is conclusive of a high order of non-dynamic correlation in the respective system.

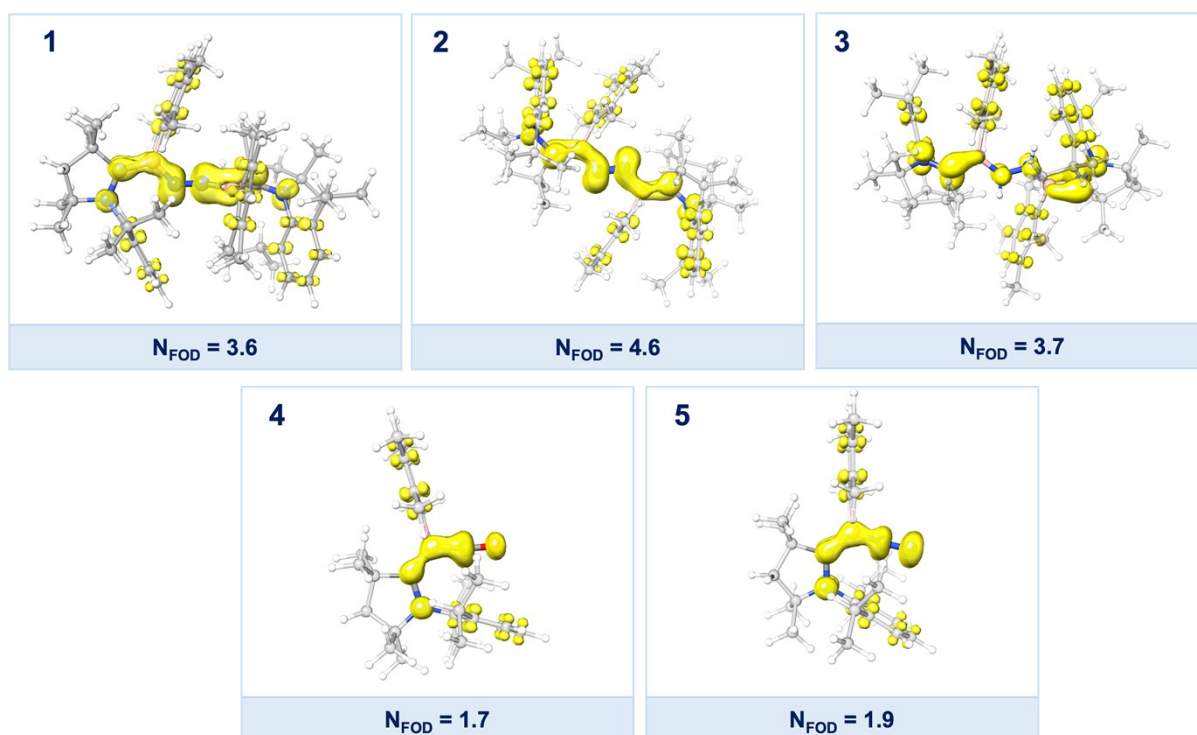

**Figure S1.** FOD plots and  $N_{\text{FOD}}$  values calculated at the B3LYP/def2-TZVP level of theory at  $T_{\text{el}} = 9000$  K for complexes **1**, **2**, **3**, **4**, and **5** showing strongly correlated electron densities. A contour surface value of  $\sigma = 0.005$  e Bohr<sup>-3</sup> is used.

The FOD analysis using B3LYP (20% HF exchange) wavefunction yields a significantly large FOD index  $N_{\text{FOD}} = 3.6$  for complex **1** (Figure S1). Most importantly, the FOD plot

reveals that the “strongly correlated” electron density is predominantly delocalized throughout the cAAC–B–N–N–B–cAAC  $\pi$ -orbital framework. This unambiguously suggests that the electronic structure of complex **1** is dominated by strong non-dynamic electron correlation and cannot be accurately described using single-determinant methods, like KS-DFT. Such predominant non-dynamic correlation effect likely stems from a small HOMO-LUMO energy gap, as also explained by Légaré, Rang, Holthausen, Braunschweig and co-workers for cAAC-borylene-(N<sub>2</sub>)<sub>2</sub> systems.<sup>3</sup> In addition to complex **1**, the FOD analysis was also performed for complex **2**, **3**, **4**, and **5**, where a significantly high FOD index  $N_{\text{FOD}}$  was obtained for all the cases (Figure S1). These results strongly justify the use of the multiconfigurational approach, i.e., the CASSCF method to decode the “true” electronic structure of the cAAC-borylene systems under investigation in this study.

### 3. Contribution of the Major Configuration in the Ground State

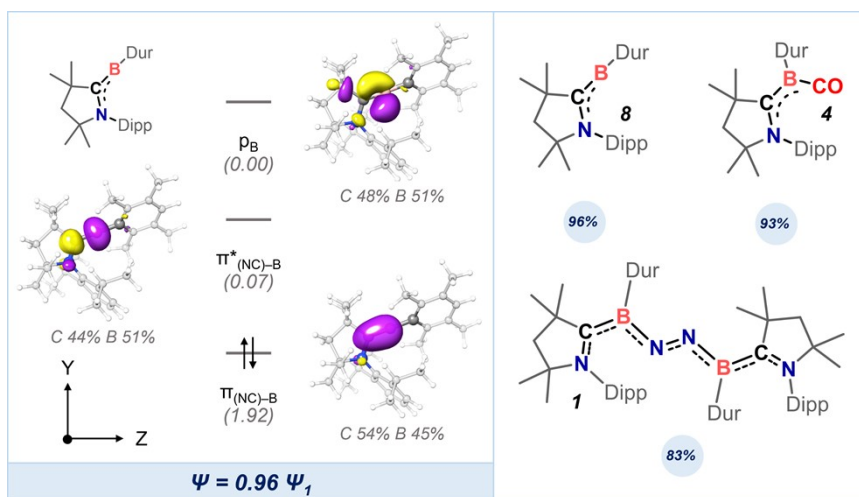

**Figure S2.** Left panel: Natural orbitals along with their occupation number and atomic orbital contributions obtained from the CASSCF (2,3) calculations for **8**. Right panel: Principal contributions of the predominant electronic configuration in the respective ground state wave functions of complex **1**, **4**, and **8**.

To observe the effect of extended  $\pi$ -conjugation in complex **1** on its ground state wave function, we successively analyzed the CASSCF-derived ground state wavefunction of the building block (**8a**), CO-bound form (**4**), and complex **1** (Figure S2). The contribution of the principal determinant configuration to the ground state wavefunction appears to be 96% in **8a**, which drops to 93% in **4** as **8a** coordinates to CO resulting in enhanced  $\pi$ -conjugation (Figure S2). This value further drops to 83% in **1** due to the extended  $\pi$ -conjugation along the cAAC–B–N–N–B–cAAC moiety (Figure 4, Figure S6), suggesting a high multi-configurational character, where the other determinants contribute >15% in the ground state wavefunction.

#### 4. Natural Bond Orbital (NBO) Analysis

Atomic charges obtained from the Natural Population Analysis (NPA) reveal an increase in negative charge on the NN fragment with simultaneous accumulation of net positive charges on the (NCB)cAAC-Borylene fragments (Figure S3). The NPA analysis along with the presented NBO acceptor-donor interaction suggests the donation of electron density from the cAAC-Borylene fragments to the  $\pi^*_{\text{NN}}$  orbitals which finally leads to the activation of the NN bond in complex **1**. The results of this NBO analysis are well in accord with the CASSCF results presented in this work. The NBO calculations were performed using the NBO7.0<sup>4</sup> program interfaced with ORCA 4.1 suit at the B3LYP/6-31G(d,p) level of theory.

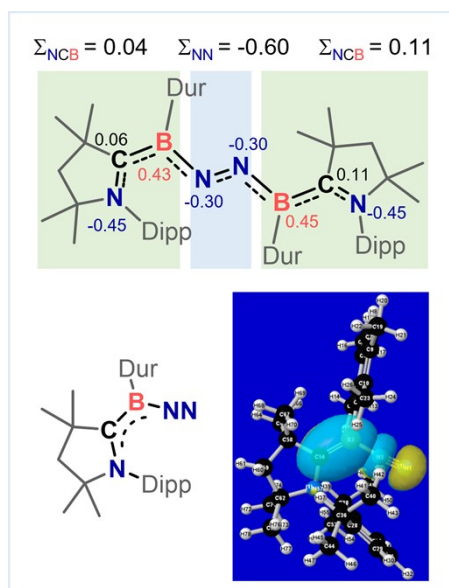

**Figure S3.** Atomic charges obtained through NPA analysis and NBO plot suggest the interaction of the  $\pi_{CB}$  (donor) and  $\pi^*_{NN}$  (acceptor).

## 5. Electronic Structure Analysis at the CASSCF Level

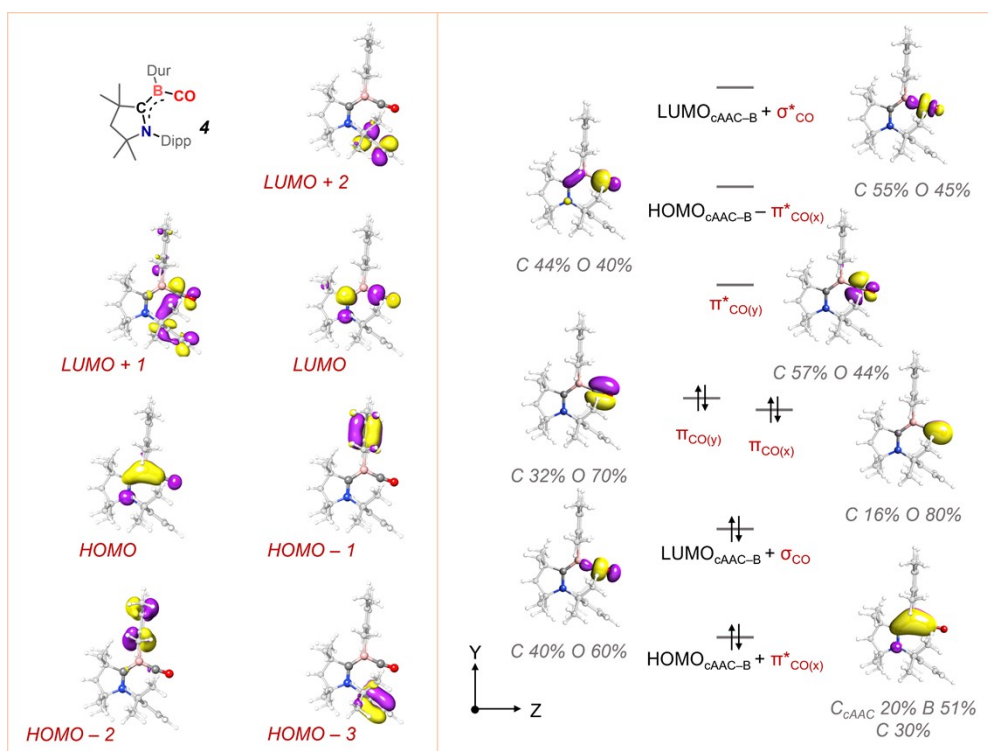

**Figure S4.** DFT-derived canonical molecular orbitals (left) and natural orbitals obtained from the CASSCF (8,7) calculation (right) for **4**.

The ground-state ( $S=0$ ) geometry of CO-bound cAAC-Borylene (**4**) was optimized using the hybrid-GGA B3LYP<sup>5,6</sup> density functional with a combination of Ahlrich's triple- $\zeta$  def2-TZVP<sup>7</sup> and def2-SVP<sup>8</sup> type basis set. The higher level of basis set was employed to the [(N-C)<sub>cAAC</sub>-B-CO] chain. The DFT-based frontier canonical orbitals of **4** along with the natural orbitals obtained from the CASSCF (8,7) calculation (Figure S4). All the calculations were performed using the ORCA 4.2.1 suite of quantum chemical programs.<sup>9</sup> Although DFT-based frontier orbitals are routinely used to investigate the electronic structure, the presented ones in Figure S4 appear inadequate in providing a complete qualitative picture of the bonding scenario of **4**. Specifically, the DFT-derived frontier orbitals, HOMO and LUMO suggest the presence of  $\pi$ -backdonation interactions. However, a complete picture of the bonding scenario involving all  $\pi$  and  $\sigma$ -type interactions is missing. On the other hand, natural orbitals obtained from the ab initio wave function-based CASSCF method could provide a complete bonding picture with balanced  $\pi$  and  $\sigma$ -type interactions for species **4** (Figure S4, right panel).

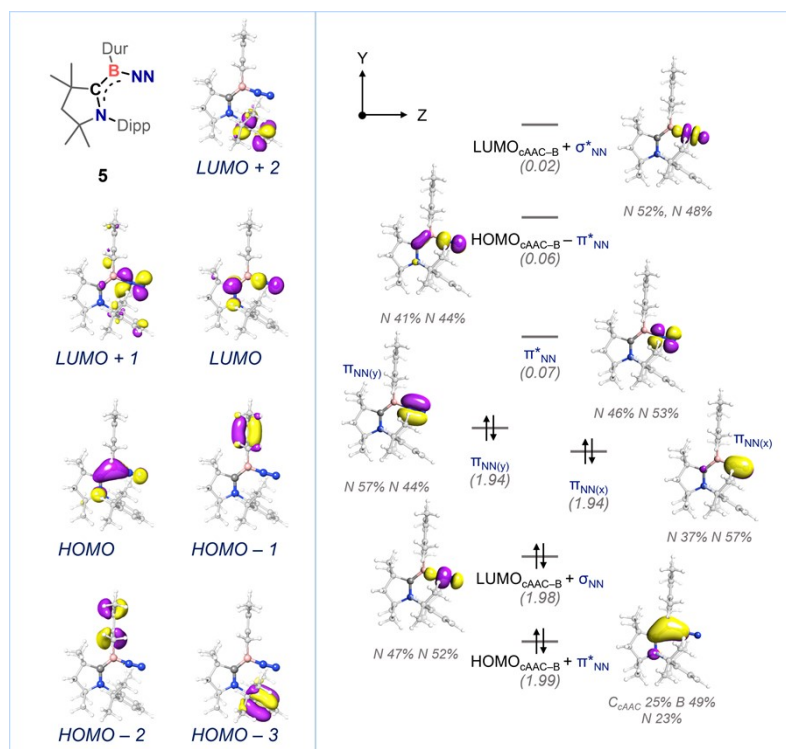

**Figure S5.** DFT-based canonical molecular orbitals (left) and natural orbitals obtained from the CASSCF (8,7) calculation (right) for **5**.

The ground-state ( $S=0$ ) geometry of  $N_2$ -bound cAAC-Borylene-NN species **5** was optimized using the hybrid-GGA B3LYP<sup>5,6</sup> density functional with a combination of Ahlrich's triple- $\zeta$  def2-TZVP<sup>7</sup> and def2-SVP<sup>8</sup> type basis set. The higher level of basis set was employed to the  $[(N-C)_{cAAC}-B-NN]$  chain. The DFT-derived frontier molecular orbitals for the monomeric  $N_2$ -bound cAAC-borylene species **5** also fall short to provide a complete picture of the underlying  $\pi$  and  $\sigma$ -type bonding scenario (Figure S5, left panel). As discussed above, the natural orbitals obtained from the multireference CASSCF method provide a complete bonding picture involving all the crucial  $\pi$  and  $\sigma$ -type bonding and anti-bonding interaction of species **5** (Figure S5).

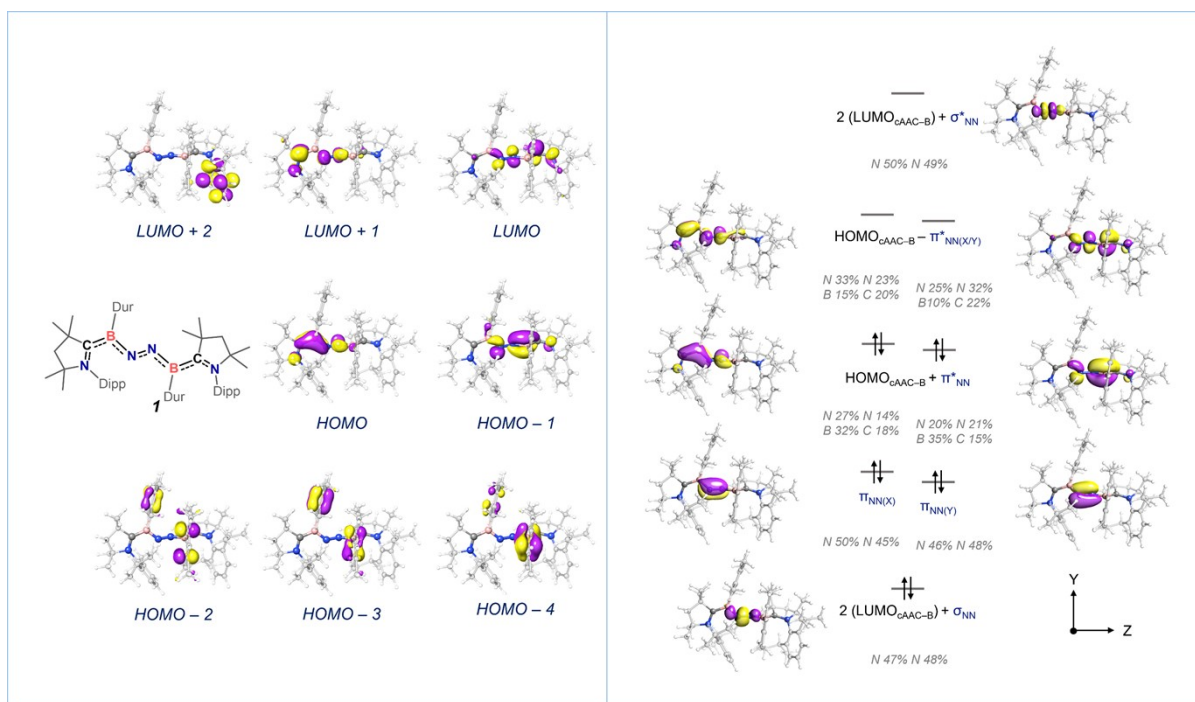

**Figure S6.** DFT-derived frontier canonical orbitals of **1** (left) and natural orbitals obtained from the CASSCF(10,8) calculation (right).

Analysis of the electronic structure of the highly conjugated N<sub>2</sub>-bound cAAC–di-borylene species **1** using DFT-based frontier canonical orbitals could only provide the  $\pi$ -type interactions centered on the B–N–N–B core (Figure S6, left panel), similar to what was observed in the case of species **4** and **5**. However, the remaining crucial  $\pi$ - and  $\sigma$ -type interactions could not be located through the frontier canonical orbitals. A complete qualitative picture of the bonding scenario involving all the crucial  $\pi$ - and  $\sigma$ -type interactions could be obtained through the natural orbitals derived from the CASSCF (10,8) calculation on **1** (Figure S6, right panel).



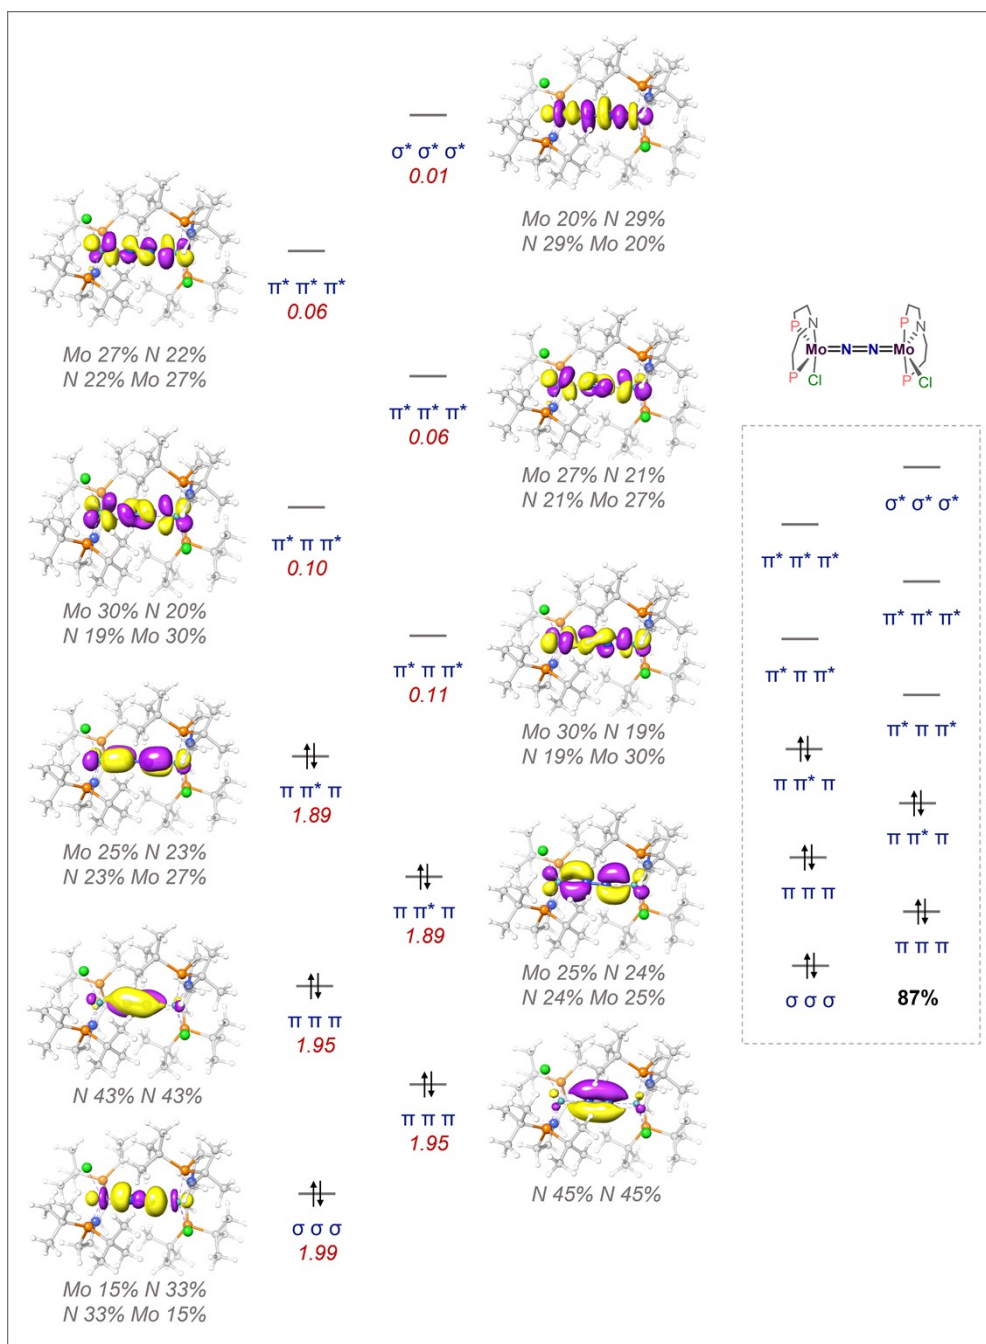

**Figure S7.** Natural orbitals along with their occupation number and atomic orbital contributions obtained from the CASSCF (10,10) calculations for complex 6.

The electronic structure of dimeric Mo–N<sub>2</sub> complex (6) was investigated at the CASSCF level. A balanced active space consisting of all  $\pi$ -symmetric molecular orbitals along with the lowest energy  $\sigma$ -symmetric orbitals was constructed as presented in Figure S7. The singlet

ground state obtained from the CASSCF(10,10) calculation has a major contribution (87%) from the electronic configuration of  $(\sigma\sigma\sigma)^2(\pi\pi\pi)^4, (\pi\pi^*\pi)^4, (\pi^*\pi\pi^*)^0, (\pi^*\pi^*\pi^*)^0(\sigma^*\sigma^*\sigma^*)^0$ .

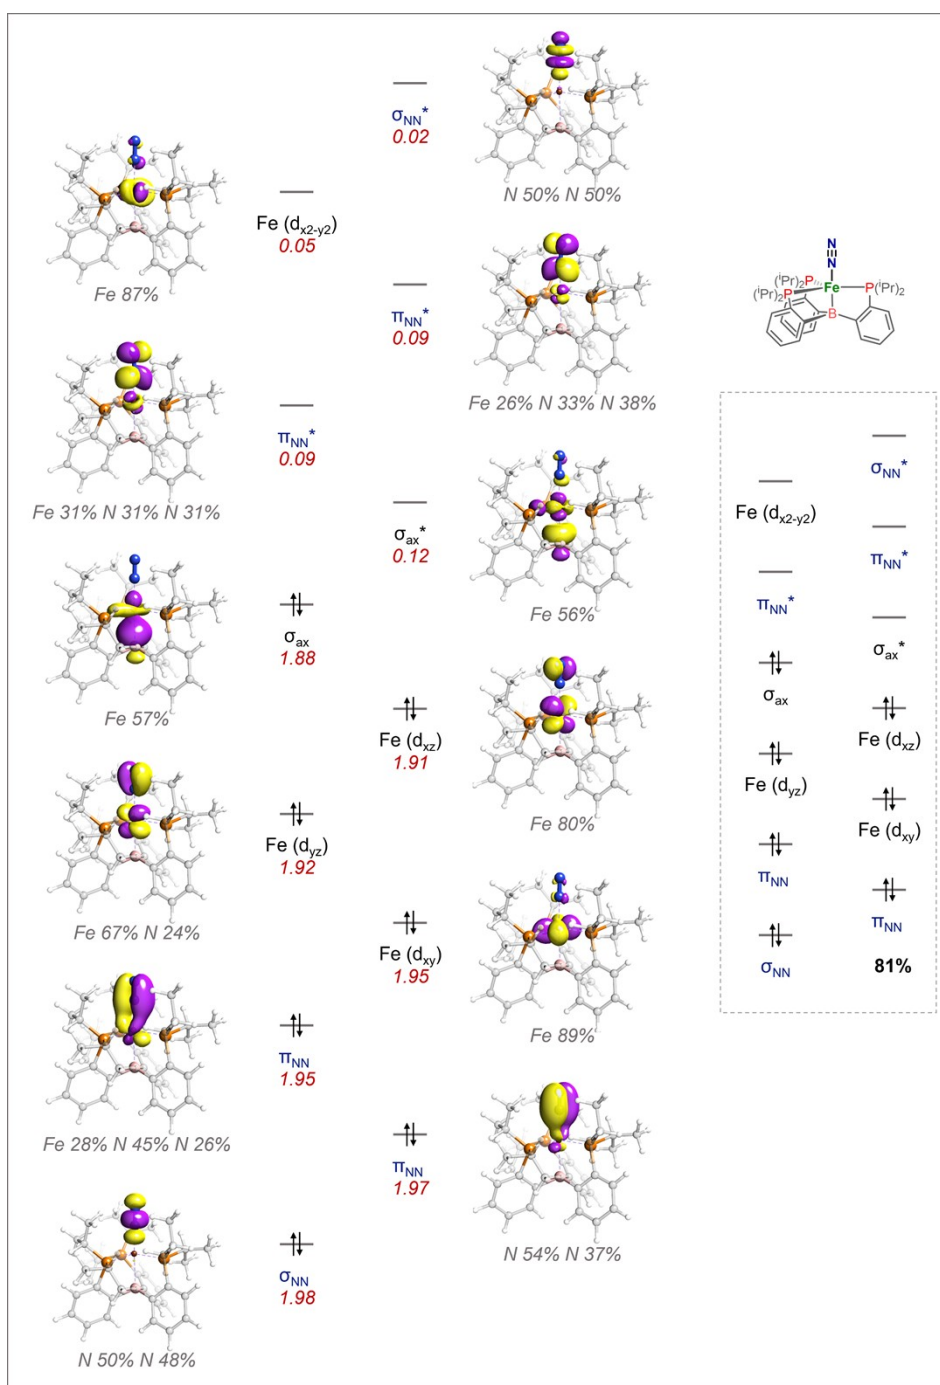

**Figure S8.** Natural orbitals along with their occupation number and atomic orbital contributions obtained from the CASSCF(14,14) calculations for complex 7. 4d orbitals are omitted for clarity.

To decipher the electronic structure of the monomeric Fe–N<sub>2</sub> complex **7** a CASSCF(14,14) was undertaken with the active space consisting of Fe-based 3d orbitals, N–N  $\sigma$ - and  $\pi$ -orbitals. The 3d<sub>xy</sub> and 3d<sub>x<sup>2</sup>-y<sup>2</sup></sub> were added as the non-bonding orbitals, and both the  $\sigma_{ax}$  and  $\sigma_{ax}^*$  interactions of the d<sub>z<sup>2</sup></sub> orbital with the axial boron orbital were included, along with all possible  $\pi$ -interactions of the d<sub>xz</sub> and d<sub>yz</sub> orbitals. In addition to the above-mentioned orbitals, Fe-4d<sub>xy</sub> and Fe-4d<sub>x<sup>2</sup>-y<sup>2</sup></sub> orbitals were added to balance the active space. The CASSCF(14,14) calculation suggested a major contribution from the electronic configuration of  $(\sigma_{NN})^2(\pi_{NN})^4(Fe-d_{xy})^2(Fe-d_{xz})^2(Fe-d_{yz})^2(\sigma_{ax})^2(\sigma_{ax}^*)^0(\pi_{NN}^*)^0(Fe-d_{x^2-y^2})^0(\sigma_{NN}^*)^0$ . The ground state (S=0) electronic structure and natural orbitals of Fe–N<sub>2</sub> complex **7**, obtained from CASSCF (14,14), are shown in Figure 8.

## 6. References

- 1 S. Grimme and A. Hansen, *Angew. Chemie Int. Ed.*, 2015, **54**, 12308–12313.
- 2 C. A. Bauer, A. Hansen and S. Grimme, *Chem. - A Eur. J.*, 2017, **23**, 6150–6164.
- 3 M.-A. Légaré, M. Rang, G. Bélanger-Chabot, J. I. Schweizer, I. Krummenacher, R. Bertermann, M. Arrowsmith, M. C. Holthausen and H. Braunschweig, *Science*, 2019, **363**, 1329–1332.
- 4 E. D. Glendening, C. R. Landis and F. Weinhold, *J. Comput. Chem.*, 2019, **40**, 2234–2241.
- 5 A. D. Becke, *J. Chem. Phys.*, 1936, **4**, 276–282.
- 6 C. Lee, W. Yang and R. G. Parr, *Phys. Rev. B*, 1988, **37**, 785–789.
- 7 A. Schäfer, C. Huber and R. Ahlrichs, *J. Chem. Phys.*, 1994, **100**, 5829–5835.
- 8 A. Schäfer, H. Horn and R. Ahlrichs, *J. Chem. Phys.*, 1992, **97**, 2571–2577.
- 9 F. Neese, *Wiley Interdiscip. Rev. Comput. Mol. Sci.*, 2012, **2**, 73–78.

## 7. Optimized Cartesian Coordinates of all the Species Involved

### Complex 1 [S=0]

|   |              |             |             |
|---|--------------|-------------|-------------|
| 7 | 11.131405000 | 3.537985000 | 4.852998000 |
| 5 | 12.060672000 | 4.532426000 | 5.144262000 |
| 5 | 9.845391000  | 2.383960000 | 3.155560000 |
| 7 | 10.108775000 | 3.230907000 | 4.254535000 |
| 6 | 12.079521000 | 5.857079000 | 4.246416000 |
| 6 | 11.190469000 | 6.928366000 | 4.469965000 |
| 6 | 11.133948000 | 8.010683000 | 3.565479000 |
| 6 | 11.927146000 | 7.972482000 | 2.417374000 |
| 1 | 11.865697000 | 8.799914000 | 1.702582000 |
| 6 | 12.829252000 | 6.930045000 | 2.169802000 |
| 6 | 12.925241000 | 5.881036000 | 3.107050000 |
| 6 | 10.281501000 | 6.940580000 | 5.667028000 |
| 1 | 9.253214000  | 7.210006000 | 5.390669000 |
| 1 | 10.620368000 | 7.672566000 | 6.416378000 |
| 1 | 10.243414000 | 5.958824000 | 6.148487000 |
| 6 | 10.231573000 | 9.189874000 | 3.828044000 |
| 1 | 10.330445000 | 9.953013000 | 3.041335000 |
| 1 | 10.463979000 | 9.666103000 | 4.795948000 |
| 1 | 9.169025000  | 8.894080000 | 3.879335000 |
| 6 | 13.693253000 | 6.987772000 | 0.931390000 |
| 1 | 13.570760000 | 6.094300000 | 0.296149000 |
| 1 | 14.766501000 | 7.054445000 | 1.179831000 |
| 1 | 13.438860000 | 7.866271000 | 0.319531000 |

|   |              |             |              |
|---|--------------|-------------|--------------|
| 6 | 13.931036000 | 4.770555000 | 2.910380000  |
| 1 | 14.618477000 | 4.712662000 | 3.768185000  |
| 1 | 14.542665000 | 4.905583000 | 2.010480000  |
| 1 | 13.439070000 | 3.791049000 | 2.839329000  |
| 6 | 13.425545000 | 6.275570000 | 7.282680000  |
| 6 | 12.441569000 | 6.284560000 | 8.307288000  |
| 6 | 11.965844000 | 7.520703000 | 8.762823000  |
| 1 | 11.203488000 | 7.543143000 | 9.544371000  |
| 6 | 12.445883000 | 8.719001000 | 8.240521000  |
| 1 | 12.058502000 | 9.673446000 | 8.606264000  |
| 6 | 13.427159000 | 8.692985000 | 7.253940000  |
| 1 | 13.809178000 | 9.633413000 | 6.852356000  |
| 6 | 13.939196000 | 7.483394000 | 6.761910000  |
| 6 | 11.906429000 | 5.023048000 | 8.978484000  |
| 1 | 12.530739000 | 4.181908000 | 8.660176000  |
| 6 | 15.044199000 | 7.540352000 | 5.720726000  |
| 1 | 15.155218000 | 6.530724000 | 5.303476000  |
| 6 | 10.464113000 | 4.693149000 | 8.562970000  |
| 1 | 9.785885000  | 5.535762000 | 8.770801000  |
| 1 | 10.098343000 | 3.820064000 | 9.126833000  |
| 1 | 10.396286000 | 4.452886000 | 7.494177000  |
| 6 | 12.015243000 | 5.103791000 | 10.511042000 |
| 1 | 13.027562000 | 5.389986000 | 10.836194000 |
| 1 | 11.776188000 | 4.125351000 | 10.958119000 |
| 1 | 11.310305000 | 5.837784000 | 10.932018000 |

|   |              |             |             |
|---|--------------|-------------|-------------|
| 6 | 14.712039000 | 8.486719000 | 4.559276000 |
| 1 | 15.435587000 | 8.347904000 | 3.739877000 |
| 1 | 14.770917000 | 9.541996000 | 4.871981000 |
| 1 | 13.709219000 | 8.300155000 | 4.163926000 |
| 6 | 16.375690000 | 7.970666000 | 6.364852000 |
| 1 | 17.198142000 | 7.911691000 | 5.633008000 |
| 1 | 16.646217000 | 7.355218000 | 7.234720000 |
| 1 | 16.309603000 | 9.014373000 | 6.712606000 |
| 6 | 13.133985000 | 4.129475000 | 6.162128000 |
| 7 | 13.912289000 | 4.987535000 | 6.846240000 |
| 6 | 15.134478000 | 4.340214000 | 7.457878000 |
| 6 | 14.661707000 | 2.882297000 | 7.554290000 |
| 1 | 14.210829000 | 2.711595000 | 8.543708000 |
| 1 | 15.496204000 | 2.175345000 | 7.448355000 |
| 6 | 13.592905000 | 2.694115000 | 6.451875000 |
| 6 | 15.486511000 | 4.938941000 | 8.816759000 |
| 1 | 15.743627000 | 6.004663000 | 8.737832000 |
| 1 | 16.359676000 | 4.407219000 | 9.224615000 |
| 1 | 14.662215000 | 4.837019000 | 9.533480000 |
| 6 | 16.339445000 | 4.454634000 | 6.509137000 |
| 1 | 16.080026000 | 4.140067000 | 5.490056000 |
| 1 | 17.147292000 | 3.800800000 | 6.872233000 |
| 1 | 16.732134000 | 5.474962000 | 6.463606000 |
| 6 | 12.441713000 | 1.823431000 | 6.981587000 |
| 1 | 11.696119000 | 1.651824000 | 6.202141000 |

|   |              |              |              |
|---|--------------|--------------|--------------|
| 1 | 11.938909000 | 2.288603000  | 7.840002000  |
| 1 | 12.845582000 | 0.849391000  | 7.304354000  |
| 6 | 14.162147000 | 2.014063000  | 5.191180000  |
| 1 | 13.388869000 | 1.934653000  | 4.417607000  |
| 1 | 14.510986000 | 0.999601000  | 5.443456000  |
| 1 | 15.009908000 | 2.564073000  | 4.763351000  |
| 6 | 11.118509000 | 1.741780000  | 2.432281000  |
| 6 | 11.688786000 | 0.553556000  | 2.952272000  |
| 6 | 12.866024000 | 0.016768000  | 2.388031000  |
| 6 | 13.468162000 | 0.683321000  | 1.316637000  |
| 1 | 14.382971000 | 0.269245000  | 0.879607000  |
| 6 | 12.940240000 | 1.867360000  | 0.791914000  |
| 6 | 11.760670000 | 2.398526000  | 1.354916000  |
| 6 | 11.071658000 | -0.163843000 | 4.130794000  |
| 1 | 10.189720000 | 0.368523000  | 4.506715000  |
| 1 | 11.789365000 | -0.258851000 | 4.961241000  |
| 1 | 10.764860000 | -1.191066000 | 3.868783000  |
| 6 | 13.484658000 | -1.241755000 | 2.943571000  |
| 1 | 12.773820000 | -2.085769000 | 2.943366000  |
| 1 | 13.799623000 | -1.105221000 | 3.993154000  |
| 1 | 14.369789000 | -1.543195000 | 2.363377000  |
| 6 | 13.633649000 | 2.569117000  | -0.348775000 |
| 1 | 14.525286000 | 2.014861000  | -0.678478000 |
| 1 | 13.954819000 | 3.584469000  | -0.059019000 |
| 1 | 12.968416000 | 2.694564000  | -1.220133000 |

|   |              |             |              |
|---|--------------|-------------|--------------|
| 6 | 11.202175000 | 3.678380000 | 0.783030000  |
| 1 | 11.910181000 | 4.513901000 | 0.894793000  |
| 1 | 10.277969000 | 3.969433000 | 1.292721000  |
| 1 | 10.987312000 | 3.582147000 | -0.294899000 |
| 6 | 7.248680000  | 3.464156000 | 4.468158000  |
| 6 | 7.142687000  | 4.825145000 | 4.090627000  |
| 6 | 7.003651000  | 5.784071000 | 5.100588000  |
| 1 | 6.906411000  | 6.836994000 | 4.828268000  |
| 6 | 7.008748000  | 5.423388000 | 6.446902000  |
| 1 | 6.910958000  | 6.189334000 | 7.220819000  |
| 6 | 7.163615000  | 4.086314000 | 6.801199000  |
| 1 | 7.201354000  | 3.812544000 | 7.857960000  |
| 6 | 7.283486000  | 3.083582000 | 5.827591000  |
| 6 | 7.251049000  | 5.287070000 | 2.642761000  |
| 1 | 7.203224000  | 4.397430000 | 2.001387000  |
| 6 | 7.529128000  | 1.651921000 | 6.282951000  |
| 1 | 7.550620000  | 1.017541000 | 5.389087000  |
| 6 | 8.613712000  | 5.953462000 | 2.396862000  |
| 1 | 8.766894000  | 6.142711000 | 1.322129000  |
| 1 | 9.436599000  | 5.329211000 | 2.763308000  |
| 1 | 8.674040000  | 6.919108000 | 2.917619000  |
| 6 | 6.117885000  | 6.237722000 | 2.227318000  |
| 1 | 6.187408000  | 6.464035000 | 1.150931000  |
| 1 | 6.183241000  | 7.196536000 | 2.765956000  |
| 1 | 5.122627000  | 5.812463000 | 2.425400000  |



|   |             |              |              |
|---|-------------|--------------|--------------|
| 6 | 8.904800000 | 1.528642000  | 6.953285000  |
| 1 | 9.152101000 | 0.471413000  | 7.143384000  |
| 1 | 8.927084000 | 2.058751000  | 7.918310000  |
| 1 | 9.681653000 | 1.962370000  | 6.316945000  |
| 6 | 6.433328000 | 1.131699000  | 7.226206000  |
| 1 | 5.425567000 | 1.240195000  | 6.798317000  |
| 1 | 6.444835000 | 1.676912000  | 8.183661000  |
| 1 | 6.595840000 | 0.065118000  | 7.452332000  |
| 6 | 8.406051000 | 2.058812000  | 2.805109000  |
| 7 | 7.280927000 | 2.474087000  | 3.428642000  |
| 6 | 7.995916000 | 1.126720000  | 1.656020000  |
| 6 | 6.469649000 | 1.340993000  | 1.553090000  |
| 1 | 6.263150000 | 2.106420000  | 0.789364000  |
| 1 | 5.937114000 | 0.426796000  | 1.254398000  |
| 6 | 6.003034000 | 1.861433000  | 2.915479000  |
| 6 | 8.359420000 | -0.334780000 | 1.986930000  |
| 1 | 7.923241000 | -1.008570000 | 1.231498000  |
| 1 | 7.991916000 | -0.645315000 | 2.974972000  |
| 1 | 9.448497000 | -0.466704000 | 1.975169000  |
| 6 | 8.643793000 | 1.499812000  | 0.313122000  |
| 1 | 8.170057000 | 0.913094000  | -0.491713000 |
| 1 | 9.718989000 | 1.286790000  | 0.305869000  |
| 1 | 8.499321000 | 2.566623000  | 0.087356000  |
| 6 | 5.510894000 | 0.725023000  | 3.824230000  |
| 1 | 4.644427000 | 0.238355000  | 3.350177000  |

|   |             |              |             |
|---|-------------|--------------|-------------|
| 1 | 5.184886000 | 1.110635000  | 4.797826000 |
| 1 | 6.280914000 | -0.038815000 | 3.991329000 |
| 6 | 4.876910000 | 2.887282000  | 2.784016000 |
| 1 | 5.133176000 | 3.684301000  | 2.076956000 |
| 1 | 4.627374000 | 3.342243000  | 3.753729000 |
| 1 | 3.977012000 | 2.378240000  | 2.406112000 |

**Complex 2 [S=0]**

|   |              |             |              |
|---|--------------|-------------|--------------|
| 7 | 0.632541000  | 9.110205000 | 2.331201000  |
| 5 | 1.517832000  | 7.928206000 | 2.360912000  |
| 6 | 0.801231000  | 6.496470000 | 2.277602000  |
| 6 | 0.181128000  | 5.899849000 | 3.398886000  |
| 6 | -0.643042000 | 4.765009000 | 3.257600000  |
| 6 | -0.865678000 | 4.238217000 | 1.981858000  |
| 1 | -1.521921000 | 3.367190000 | 1.867136000  |
| 6 | -0.270294000 | 4.801691000 | 0.850391000  |
| 6 | 1.208253000  | 6.520663000 | -0.229865000 |
| 1 | 0.445959000  | 6.921504000 | -0.922142000 |
| 1 | 1.793837000  | 5.772799000 | -0.796797000 |
| 1 | 1.873610000  | 7.344425000 | 0.056873000  |
| 6 | -0.527670000 | 4.207496000 | -0.512564000 |
| 1 | 0.403706000  | 3.847385000 | -0.988157000 |
| 1 | -0.960952000 | 4.949663000 | -1.206221000 |
| 1 | -1.225017000 | 3.355728000 | -0.451799000 |
| 6 | -1.318026000 | 4.153605000 | 4.459788000  |

|   |              |             |             |
|---|--------------|-------------|-------------|
| 1 | -1.902226000 | 3.261343000 | 4.180950000 |
| 1 | -2.006561000 | 4.870797000 | 4.941352000 |
| 1 | -0.587083000 | 3.856581000 | 5.232278000 |
| 6 | 0.349824000  | 6.510079000 | 4.765558000 |
| 1 | 0.782593000  | 5.796574000 | 5.487928000 |
| 1 | -0.618314000 | 6.853849000 | 5.169720000 |
| 1 | 1.014489000  | 7.376868000 | 4.708377000 |
| 6 | 0.573735000  | 5.921698000 | 1.002955000 |
| 6 | 3.908276000  | 6.324736000 | 3.610468000 |
| 6 | 3.893603000  | 6.806598000 | 4.954875000 |
| 6 | 3.780483000  | 5.903329000 | 6.014868000 |
| 1 | 3.768843000  | 6.286799000 | 7.039747000 |
| 6 | 3.711401000  | 4.524271000 | 5.798742000 |
| 1 | 3.627545000  | 3.832058000 | 6.642503000 |
| 6 | 3.749107000  | 4.048310000 | 4.492236000 |
| 1 | 3.682212000  | 2.971557000 | 4.312194000 |
| 6 | 3.831210000  | 4.917813000 | 3.394108000 |
| 6 | 4.097377000  | 8.277114000 | 5.287265000 |
| 1 | 4.305132000  | 8.784649000 | 4.343610000 |
| 6 | 3.765755000  | 4.326160000 | 1.995133000 |
| 1 | 3.562372000  | 5.169723000 | 1.320355000 |
| 6 | 5.320400000  | 8.483273000 | 6.198283000 |
| 1 | 5.544918000  | 9.559499000 | 6.298879000 |
| 1 | 6.215544000  | 7.982755000 | 5.794093000 |
| 1 | 5.149554000  | 8.085534000 | 7.213098000 |

|   |             |              |              |
|---|-------------|--------------|--------------|
| 6 | 2.854626000 | 8.950869000  | 5.885450000  |
| 1 | 3.088063000 | 9.982470000  | 6.200080000  |
| 1 | 2.480862000 | 8.404160000  | 6.767461000  |
| 1 | 2.054751000 | 9.005396000  | 5.135195000  |
| 6 | 2.618089000 | 3.316038000  | 1.848656000  |
| 1 | 2.449040000 | 3.075803000  | 0.785343000  |
| 1 | 1.683146000 | 3.716915000  | 2.255404000  |
| 1 | 2.844048000 | 2.367285000  | 2.367674000  |
| 6 | 5.089400000 | 3.661690000  | 1.579286000  |
| 1 | 5.030339000 | 3.280616000  | 0.544082000  |
| 1 | 5.315775000 | 2.805392000  | 2.238869000  |
| 1 | 5.941086000 | 4.354455000  | 1.637093000  |
| 7 | 3.979249000 | 7.212609000  | 2.509284000  |
| 6 | 3.628252000 | 9.526832000  | 1.895232000  |
| 6 | 5.137011000 | 9.168351000  | 1.898076000  |
| 1 | 5.684515000 | 9.639470000  | 1.064397000  |
| 1 | 5.605244000 | 9.527800000  | 2.829571000  |
| 6 | 5.240030000 | 7.619930000  | 1.858233000  |
| 6 | 3.334461000 | 10.737651000 | 2.805583000  |
| 1 | 2.248581000 | 10.900612000 | 2.834479000  |
| 1 | 3.692405000 | 10.579249000 | 3.832665000  |
| 1 | 3.823655000 | 11.652344000 | 2.419574000  |
| 6 | 3.151465000 | 9.932496000  | 0.481026000  |
| 1 | 2.067770000 | 10.114977000 | 0.518034000  |
| 1 | 3.343792000 | 9.143155000  | -0.260477000 |

|   |              |              |              |
|---|--------------|--------------|--------------|
| 1 | 3.659027000  | 10.855208000 | 0.139202000  |
| 6 | 6.480911000  | 7.132578000  | 2.609678000  |
| 1 | 7.391762000  | 7.494183000  | 2.103224000  |
| 1 | 6.525491000  | 6.034902000  | 2.654818000  |
| 1 | 6.489369000  | 7.506290000  | 3.642859000  |
| 6 | 5.289321000  | 7.122099000  | 0.398096000  |
| 1 | 6.103158000  | 7.614539000  | -0.163341000 |
| 1 | 4.339068000  | 7.342338000  | -0.105305000 |
| 1 | 5.451676000  | 6.036379000  | 0.352002000  |
| 6 | 2.957434000  | 8.208487000  | 2.333104000  |
| 7 | -0.632073000 | 8.917048000  | 2.331647000  |
| 5 | -1.517451000 | 10.099022000 | 2.360774000  |
| 6 | -0.800961000 | 11.530747000 | 2.276373000  |
| 6 | -0.181499000 | 12.128695000 | 3.397288000  |
| 6 | 0.642273000  | 13.263729000 | 3.255200000  |
| 6 | 0.865299000  | 13.789255000 | 1.979008000  |
| 1 | 1.521250000  | 14.660419000 | 1.863665000  |
| 6 | 0.270616000  | 13.224378000 | 0.847863000  |
| 6 | -1.206932000 | 11.503837000 | -0.231240000 |
| 1 | -0.444170000 | 11.102897000 | -0.922929000 |
| 1 | -1.792830000 | 12.250841000 | -0.798987000 |
| 1 | -1.871885000 | 10.679919000 | 0.055990000  |
| 6 | 0.528509000  | 13.817120000 | -0.515628000 |
| 1 | -0.402760000 | 14.176108000 | -0.992265000 |
| 1 | 0.962683000  | 13.074360000 | -1.208093000 |

|   |              |              |              |
|---|--------------|--------------|--------------|
| 1 | 1.225329000  | 14.669360000 | -0.455430000 |
| 6 | 1.316361000  | 13.876714000 | 4.457086000  |
| 1 | 1.899656000  | 14.769412000 | 4.177748000  |
| 1 | 2.005590000  | 13.160615000 | 4.939300000  |
| 1 | 0.584950000  | 14.173480000 | 5.229224000  |
| 6 | -0.350622000 | 11.519844000 | 4.764532000  |
| 1 | -0.786609000 | 12.233123000 | 5.485198000  |
| 1 | 0.617775000  | 11.179364000 | 5.170805000  |
| 1 | -1.012851000 | 10.651162000 | 4.707429000  |
| 6 | -0.573133000 | 12.104281000 | 1.001225000  |
| 6 | -3.908425000 | 11.703071000 | 3.609352000  |
| 6 | -3.894084000 | 11.222189000 | 4.954106000  |
| 6 | -3.781543000 | 12.126245000 | 6.013493000  |
| 1 | -3.770227000 | 11.743520000 | 7.038655000  |
| 6 | -3.712618000 | 13.505158000 | 5.796398000  |
| 1 | -3.629209000 | 14.197993000 | 6.639694000  |
| 6 | -3.749932000 | 13.980171000 | 4.489534000  |
| 1 | -3.683178000 | 15.056808000 | 4.308743000  |
| 6 | -3.831548000 | 13.109868000 | 3.392010000  |
| 6 | -4.097691000 | 9.751877000  | 5.287445000  |
| 1 | -4.304687000 | 9.243586000  | 4.344033000  |
| 6 | -3.765911000 | 13.700547000 | 1.992633000  |
| 1 | -3.562405000 | 12.856521000 | 1.318475000  |
| 6 | -5.321185000 | 9.546048000  | 6.197891000  |
| 1 | -5.545511000 | 8.469840000  | 6.299105000  |

|   |              |              |             |
|---|--------------|--------------|-------------|
| 1 | -6.216212000 | 10.046071000 | 5.792839000 |
| 1 | -5.150998000 | 9.944548000  | 7.212519000 |
| 6 | -2.855088000 | 9.078986000  | 5.886880000 |
| 1 | -3.088287000 | 8.047468000  | 6.201954000 |
| 1 | -2.482139000 | 9.626373000  | 6.768817000 |
| 1 | -2.054703000 | 9.024392000  | 5.137172000 |
| 6 | -2.618248000 | 14.710582000 | 1.845604000 |
| 1 | -2.449197000 | 14.950226000 | 0.782159000 |
| 1 | -1.683310000 | 14.309919000 | 2.252565000 |
| 1 | -2.844188000 | 15.659619000 | 2.364111000 |
| 6 | -5.089515000 | 14.364689000 | 1.576148000 |
| 1 | -5.030317000 | 14.745036000 | 0.540685000 |
| 1 | -5.316023000 | 15.221445000 | 2.235094000 |
| 1 | -5.941182000 | 13.671935000 | 1.634318000 |
| 7 | -3.979018000 | 10.814432000 | 2.508784000 |
| 6 | -3.627622000 | 8.499935000  | 1.896003000 |
| 6 | -5.136420000 | 8.858227000  | 1.898497000 |
| 1 | -5.683809000 | 8.386482000  | 1.065095000 |
| 1 | -5.604708000 | 8.499379000  | 2.830199000 |
| 6 | -5.239567000 | 10.406603000 | 1.857602000 |
| 6 | -3.333668000 | 7.289693000  | 2.807082000 |
| 1 | -2.247755000 | 7.126904000  | 2.835919000 |
| 1 | -3.691536000 | 7.448707000  | 3.834093000 |
| 1 | -3.822765000 | 6.374693000  | 2.421673000 |
| 6 | -3.150749000 | 8.093517000  | 0.482045000 |

|   |              |              |              |
|---|--------------|--------------|--------------|
| 1 | -2.067052000 | 7.911067000  | 0.519154000  |
| 1 | -3.343102000 | 8.882441000  | -0.259898000 |
| 1 | -3.658287000 | 7.170605000  | 0.140728000  |
| 6 | -6.480715000 | 10.894337000 | 2.608347000  |
| 1 | -7.391369000 | 10.532263000 | 2.101870000  |
| 1 | -6.525449000 | 11.992039000 | 2.652726000  |
| 1 | -6.489419000 | 10.521328000 | 3.641779000  |
| 6 | -5.288418000 | 10.903496000 | 0.397133000  |
| 1 | -6.101775000 | 10.410359000 | -0.164385000 |
| 1 | -4.337819000 | 10.683390000 | -0.105684000 |
| 1 | -5.451245000 | 11.989111000 | 0.350306000  |
| 6 | -2.957023000 | 9.818620000  | 2.333259000  |

**Complex 3 [S=1]**

|   |             |              |             |
|---|-------------|--------------|-------------|
| 7 | 2.403648000 | 7.655039000  | 6.073154000 |
| 1 | 2.619563000 | 6.174924000  | 4.742821000 |
| 5 | 3.037061000 | 8.739686000  | 5.425667000 |
| 5 | 1.155225000 | 5.527237000  | 6.204955000 |
| 1 | 2.112027000 | 7.714372000  | 7.033347000 |
| 7 | 2.054257000 | 6.408757000  | 5.542099000 |
| 6 | 3.528632000 | 9.877003000  | 6.329266000 |
| 7 | 3.735721000 | 11.178517000 | 5.885035000 |
| 6 | 4.022258000 | 9.744496000  | 7.780771000 |
| 6 | 4.420019000 | 11.198813000 | 8.132539000 |
| 1 | 3.598485000 | 11.684122000 | 8.681239000 |



|   |              |              |             |
|---|--------------|--------------|-------------|
| 1 | 5.308535000  | 11.241418000 | 8.780006000 |
| 6 | 4.638625000  | 11.942876000 | 6.800461000 |
| 6 | 2.947158000  | 9.253090000  | 8.776772000 |
| 1 | 1.980874000  | 9.752237000  | 8.635188000 |
| 1 | 3.280789000  | 9.445887000  | 9.810451000 |
| 1 | 2.778826000  | 8.170432000  | 8.705722000 |
| 6 | 5.221925000  | 8.781130000  | 7.903475000 |
| 1 | 4.947118000  | 7.778548000  | 7.547614000 |
| 1 | 5.537029000  | 8.692735000  | 8.956710000 |
| 1 | 6.090104000  | 9.119215000  | 7.322818000 |
| 6 | 4.250637000  | 13.416214000 | 6.909734000 |
| 1 | 4.327581000  | 13.932354000 | 5.943605000 |
| 1 | 4.923805000  | 13.920181000 | 7.620298000 |
| 1 | 3.221381000  | 13.535921000 | 7.271207000 |
| 6 | 6.104178000  | 11.816371000 | 6.344467000 |
| 1 | 6.360032000  | 10.770871000 | 6.128709000 |
| 1 | 6.779538000  | 12.182006000 | 7.134478000 |
| 1 | 6.299352000  | 12.403531000 | 5.440339000 |
| 6 | 0.996105000  | 4.051597000  | 5.863530000 |
| 7 | 1.849475000  | 3.296727000  | 5.074126000 |
| 6 | 0.126182000  | 1.822651000  | 5.590581000 |
| 1 | -0.134986000 | 0.925781000  | 6.171343000 |
| 1 | -0.503324000 | 1.824270000  | 4.687041000 |
| 6 | -0.114747000 | 3.130662000  | 6.385144000 |
| 6 | -1.515657000 | 3.679386000  | 6.059688000 |

|   |              |              |             |
|---|--------------|--------------|-------------|
| 1 | -1.594790000 | 3.962838000  | 4.999207000 |
| 1 | -1.746940000 | 4.560411000  | 6.671637000 |
| 1 | -2.282264000 | 2.913763000  | 6.269387000 |
| 6 | -0.043468000 | 2.884553000  | 7.906779000 |
| 1 | 0.944936000  | 2.526695000  | 8.224821000 |
| 1 | -0.790418000 | 2.129293000  | 8.203001000 |
| 1 | -0.259871000 | 3.807710000  | 8.459340000 |
| 6 | 1.600542000  | 1.826857000  | 5.161389000 |
| 6 | 1.821966000  | 1.118740000  | 3.824142000 |
| 1 | 1.165560000  | 1.512889000  | 3.039182000 |
| 1 | 1.604716000  | 0.045924000  | 3.941927000 |
| 1 | 2.863960000  | 1.218134000  | 3.485381000 |
| 6 | 2.501253000  | 1.157270000  | 6.215699000 |
| 1 | 2.173369000  | 0.118116000  | 6.377037000 |
| 1 | 2.461987000  | 1.680317000  | 7.179674000 |
| 1 | 3.546146000  | 1.127369000  | 5.882148000 |
| 6 | 2.813431000  | 11.810655000 | 4.985414000 |
| 6 | 1.479432000  | 12.047497000 | 5.415962000 |
| 6 | 0.567992000  | 12.620610000 | 4.521303000 |
| 1 | -0.460207000 | 12.795730000 | 4.845877000 |
| 6 | 0.949995000  | 12.984098000 | 3.232448000 |
| 1 | 0.224804000  | 13.428630000 | 2.545933000 |
| 6 | 2.267264000  | 12.785170000 | 2.830533000 |
| 1 | 2.568896000  | 13.079823000 | 1.823813000 |
| 6 | 3.215942000  | 12.204987000 | 3.685433000 |

|   |              |              |             |
|---|--------------|--------------|-------------|
| 6 | 1.003646000  | 11.754367000 | 6.832512000 |
| 1 | 1.882055000  | 11.476627000 | 7.421281000 |
| 6 | 0.388569000  | 12.996730000 | 7.498411000 |
| 1 | 1.063860000  | 13.864721000 | 7.442684000 |
| 1 | 0.177495000  | 12.793044000 | 8.561040000 |
| 1 | -0.562732000 | 13.286820000 | 7.024646000 |
| 6 | 0.027269000  | 10.572981000 | 6.894371000 |
| 1 | -0.866345000 | 10.765784000 | 6.279270000 |
| 1 | -0.306390000 | 10.394587000 | 7.928504000 |
| 1 | 0.493804000  | 9.646578000  | 6.536413000 |
| 6 | 4.640297000  | 12.042438000 | 3.179480000 |
| 1 | 5.137943000  | 11.326794000 | 3.848629000 |
| 6 | 5.399420000  | 13.381316000 | 3.217020000 |
| 1 | 6.451730000  | 13.240446000 | 2.919128000 |
| 1 | 5.387708000  | 13.849504000 | 4.210158000 |
| 1 | 4.944267000  | 14.097979000 | 2.513891000 |
| 6 | 4.699640000  | 11.475682000 | 1.755095000 |
| 1 | 4.391338000  | 12.226159000 | 1.008893000 |
| 1 | 4.055805000  | 10.598533000 | 1.644001000 |
| 1 | 5.731027000  | 11.178283000 | 1.506537000 |
| 6 | 2.795754000  | 3.844674000  | 4.156569000 |
| 6 | 4.153498000  | 4.001053000  | 4.522357000 |
| 6 | 5.057030000  | 4.463599000  | 3.554721000 |
| 1 | 6.111337000  | 4.575879000  | 3.817955000 |
| 6 | 4.631068000  | 4.800648000  | 2.273596000 |

|   |              |             |             |
|---|--------------|-------------|-------------|
| 1 | 5.346877000  | 5.159012000 | 1.533469000 |
| 6 | 3.281666000  | 4.703785000 | 1.944333000 |
| 1 | 2.950404000  | 5.015268000 | 0.952448000 |
| 6 | 2.345472000  | 4.222161000 | 2.866000000 |
| 6 | 4.652071000  | 3.760550000 | 5.939563000 |
| 1 | 3.802809000  | 3.388549000 | 6.525184000 |
| 6 | 5.111869000  | 5.076203000 | 6.590474000 |
| 1 | 5.990895000  | 5.495108000 | 6.075082000 |
| 1 | 5.390827000  | 4.908554000 | 7.643347000 |
| 1 | 4.316637000  | 5.832415000 | 6.563935000 |
| 6 | 5.773966000  | 2.712707000 | 5.994138000 |
| 1 | 5.486216000  | 1.776722000 | 5.491672000 |
| 1 | 6.033533000  | 2.475322000 | 7.038771000 |
| 1 | 6.688766000  | 3.081049000 | 5.502173000 |
| 6 | 0.875927000  | 4.170590000 | 2.471662000 |
| 1 | 0.343700000  | 3.599826000 | 3.243175000 |
| 6 | 0.283014000  | 5.586240000 | 2.462093000 |
| 1 | 0.780555000  | 6.209274000 | 1.705284000 |
| 1 | 0.426555000  | 6.074289000 | 3.434070000 |
| 1 | -0.795965000 | 5.560188000 | 2.237816000 |
| 6 | 0.644544000  | 3.477234000 | 1.121249000 |
| 1 | 1.063056000  | 4.064251000 | 0.288310000 |
| 1 | -0.434972000 | 3.364407000 | 0.930513000 |
| 1 | 1.105721000  | 2.478219000 | 1.087616000 |
| 6 | 3.267825000  | 8.622217000 | 3.857163000 |

|   |             |              |              |
|---|-------------|--------------|--------------|
| 6 | 2.180340000 | 8.756154000  | 2.962817000  |
| 6 | 2.369370000 | 8.564753000  | 1.578076000  |
| 6 | 3.639591000 | 8.214408000  | 1.110578000  |
| 1 | 3.786457000 | 8.065267000  | 0.035854000  |
| 6 | 4.739341000 | 8.109778000  | 1.964947000  |
| 6 | 4.551858000 | 8.319525000  | 3.346608000  |
| 6 | 0.814054000 | 9.148710000  | 3.460686000  |
| 1 | 0.534065000 | 10.148095000 | 3.091344000  |
| 1 | 0.777769000 | 9.181689000  | 4.553462000  |
| 1 | 0.037614000 | 8.446575000  | 3.119552000  |
| 6 | 1.237985000 | 8.789985000  | 0.607396000  |
| 1 | 1.538881000 | 8.547252000  | -0.422725000 |
| 1 | 0.909616000 | 9.843624000  | 0.624253000  |
| 1 | 0.349299000 | 8.186545000  | 0.852843000  |
| 6 | 6.112186000 | 7.845183000  | 1.402945000  |
| 1 | 6.064855000 | 7.599965000  | 0.331320000  |
| 1 | 6.625631000 | 7.019369000  | 1.921146000  |
| 1 | 6.764328000 | 8.730021000  | 1.512075000  |
| 6 | 5.747767000 | 8.216289000  | 4.258300000  |
| 1 | 6.186202000 | 7.204674000  | 4.234864000  |
| 1 | 5.480257000 | 8.441541000  | 5.294986000  |
| 1 | 6.547064000 | 8.914853000  | 3.957298000  |
| 6 | 0.378460000 | 6.196997000  | 7.423319000  |
| 6 | 0.915808000 | 6.097131000  | 8.727757000  |
| 6 | 0.285081000 | 6.749393000  | 9.807744000  |

|   |              |             |              |
|---|--------------|-------------|--------------|
| 6 | -0.882094000 | 7.479521000 | 9.565220000  |
| 1 | -1.378083000 | 7.978652000 | 10.403709000 |
| 6 | -1.434671000 | 7.595942000 | 8.286073000  |
| 6 | -0.787209000 | 6.964340000 | 7.204344000  |
| 6 | 2.177857000  | 5.306605000 | 8.985475000  |
| 1 | 2.539206000  | 4.816630000 | 8.072813000  |
| 1 | 2.017647000  | 4.522971000 | 9.744191000  |
| 1 | 2.990313000  | 5.949086000 | 9.366449000  |
| 6 | 0.855285000  | 6.664859000 | 11.200253000 |
| 1 | 0.903111000  | 5.622303000 | 11.558942000 |
| 1 | 0.249241000  | 7.239482000 | 11.916096000 |
| 1 | 1.886512000  | 7.055776000 | 11.240911000 |
| 6 | -2.698463000 | 8.389080000 | 8.072345000  |
| 1 | -2.549746000 | 9.206340000 | 7.347893000  |
| 1 | -3.056187000 | 8.832493000 | 9.013427000  |
| 1 | -3.507930000 | 7.757421000 | 7.667661000  |
| 6 | -1.353899000 | 7.132898000 | 5.816187000  |
| 1 | -1.350428000 | 8.191645000 | 5.511980000  |
| 1 | -2.400294000 | 6.789728000 | 5.756991000  |
| 1 | -0.776082000 | 6.573354000 | 5.072157000  |

**Complex 4 [S=0]**

|   |              |             |              |
|---|--------------|-------------|--------------|
| 5 | -5.140164000 | 4.750287000 | 12.928456000 |
| 8 | -3.614238000 | 4.255234000 | 14.990855000 |

|   |              |             |              |
|---|--------------|-------------|--------------|
| 6 | -4.362726000 | 4.459554000 | 14.133460000 |
| 6 | -4.200342000 | 5.300522000 | 11.750162000 |
| 6 | -3.982305000 | 6.694051000 | 11.607922000 |
| 6 | -3.141034000 | 7.182497000 | 10.585252000 |
| 6 | -2.523973000 | 6.272324000 | 9.723983000  |
| 1 | -1.868465000 | 6.651360000 | 8.933283000  |
| 6 | -2.708301000 | 4.892517000 | 9.845303000  |
| 6 | -3.549090000 | 4.403099000 | 10.866384000 |
| 6 | -4.623757000 | 7.693102000 | 12.541574000 |
| 1 | -3.867280000 | 8.209013000 | 13.158594000 |
| 1 | -5.330117000 | 7.206868000 | 13.222183000 |
| 1 | -5.164122000 | 8.480450000 | 11.989851000 |
| 6 | -2.893453000 | 8.661693000 | 10.423933000 |
| 1 | -2.195672000 | 8.861028000 | 9.597034000  |
| 1 | -2.467305000 | 9.107182000 | 11.339134000 |
| 1 | -3.826697000 | 9.213777000 | 10.217728000 |
| 6 | -2.006505000 | 3.950567000 | 8.898482000  |
| 1 | -1.377776000 | 4.500508000 | 8.182476000  |
| 1 | -2.722552000 | 3.342473000 | 8.318764000  |
| 1 | -1.359377000 | 3.237160000 | 9.437112000  |
| 6 | -3.741588000 | 2.910456000 | 10.978627000 |
| 1 | -4.065556000 | 2.471598000 | 10.020126000 |
| 1 | -4.490320000 | 2.660673000 | 11.737645000 |
| 1 | -2.801657000 | 2.400348000 | 11.252637000 |
| 6 | -6.615011000 | 4.547052000 | 12.901335000 |

|   |               |             |              |
|---|---------------|-------------|--------------|
| 7 | -7.403135000  | 4.148570000 | 13.933081000 |
| 6 | -8.869860000  | 4.097139000 | 13.633663000 |
| 6 | -8.847045000  | 4.138086000 | 12.098377000 |
| 1 | -9.714142000  | 4.674743000 | 11.687357000 |
| 1 | -8.885607000  | 3.107604000 | 11.713409000 |
| 6 | -7.505262000  | 4.783456000 | 11.679296000 |
| 6 | -9.518374000  | 2.817211000 | 14.163753000 |
| 1 | -9.092264000  | 1.923389000 | 13.693093000 |
| 1 | -10.595978000 | 2.835639000 | 13.939540000 |
| 1 | -9.401224000  | 2.731134000 | 15.254421000 |
| 6 | -9.616229000  | 5.295270000 | 14.237203000 |
| 1 | -9.589587000  | 5.256364000 | 15.333628000 |
| 1 | -10.672055000 | 5.264193000 | 13.926727000 |
| 1 | -9.194756000  | 6.255089000 | 13.912877000 |
| 6 | -6.972286000  | 4.099765000 | 10.410896000 |
| 1 | -6.051382000  | 4.575387000 | 10.051702000 |
| 1 | -7.729009000  | 4.165618000 | 9.611305000  |
| 1 | -6.760308000  | 3.036165000 | 10.594641000 |
| 6 | -7.647550000  | 6.294157000 | 11.407024000 |
| 1 | -7.965804000  | 6.850701000 | 12.299963000 |
| 1 | -8.393672000  | 6.464230000 | 10.613517000 |
| 1 | -6.690691000  | 6.714082000 | 11.071659000 |
| 6 | -6.858195000  | 3.819575000 | 15.215557000 |
| 6 | -6.685357000  | 4.825123000 | 16.200252000 |
| 6 | -6.184534000  | 4.447914000 | 17.453802000 |



|   |              |              |              |
|---|--------------|--------------|--------------|
| 1 | -6.051119000 | 5.209104000  | 18.225546000 |
| 6 | -5.829991000 | 3.130162000  | 17.726192000 |
| 1 | -5.438191000 | 2.859073000  | 18.709766000 |
| 6 | -5.947704000 | 2.164202000  | 16.730729000 |
| 1 | -5.631570000 | 1.139543000  | 16.937464000 |
| 6 | -6.448380000 | 2.483921000  | 15.462388000 |
| 6 | -6.937682000 | 6.305799000  | 15.945807000 |
| 1 | -7.299403000 | 6.411596000  | 14.915803000 |
| 6 | -5.633476000 | 7.115732000  | 16.058912000 |
| 1 | -4.852350000 | 6.716420000  | 15.400555000 |
| 1 | -5.246357000 | 7.105245000  | 17.090058000 |
| 1 | -5.811619000 | 8.166507000  | 15.779352000 |
| 6 | -7.990818000 | 6.893059000  | 16.900243000 |
| 1 | -8.235743000 | 7.928678000  | 16.613532000 |
| 1 | -7.614644000 | 6.918622000  | 17.935503000 |
| 1 | -8.922872000 | 6.310505000  | 16.904677000 |
| 6 | -6.461546000 | 1.394244000  | 14.396883000 |
| 1 | -6.914242000 | 1.816418000  | 13.489313000 |
| 6 | -7.282393000 | 0.166363000  | 14.826516000 |
| 1 | -7.365835000 | -0.550889000 | 13.993731000 |
| 1 | -8.297690000 | 0.436741000  | 15.149705000 |
| 1 | -6.797755000 | -0.359715000 | 15.664531000 |
| 6 | -5.029219000 | 0.962799000  | 14.034541000 |
| 1 | -5.045167000 | 0.241500000  | 13.201247000 |
| 1 | -4.532109000 | 0.477540000  | 14.889813000 |

|   |              |             |              |
|---|--------------|-------------|--------------|
| 1 | -4.417218000 | 1.821255000 | 13.731560000 |
|---|--------------|-------------|--------------|

**Complex 5 [S=0]**

|   |              |             |             |
|---|--------------|-------------|-------------|
| 7 | 11.131405000 | 3.537985000 | 4.852998000 |
|---|--------------|-------------|-------------|

|   |             |             |             |
|---|-------------|-------------|-------------|
| 5 | 9.845391000 | 2.383960000 | 3.155560000 |
|---|-------------|-------------|-------------|

|   |              |             |             |
|---|--------------|-------------|-------------|
| 7 | 10.108775000 | 3.230907000 | 4.254535000 |
|---|--------------|-------------|-------------|

|   |              |             |             |
|---|--------------|-------------|-------------|
| 6 | 11.118509000 | 1.741780000 | 2.432281000 |
|---|--------------|-------------|-------------|

|   |              |             |             |
|---|--------------|-------------|-------------|
| 6 | 11.688786000 | 0.553556000 | 2.952272000 |
|---|--------------|-------------|-------------|

|   |              |             |             |
|---|--------------|-------------|-------------|
| 6 | 12.866024000 | 0.016768000 | 2.388031000 |
|---|--------------|-------------|-------------|

|   |              |             |             |
|---|--------------|-------------|-------------|
| 6 | 13.468162000 | 0.683321000 | 1.316637000 |
|---|--------------|-------------|-------------|

|   |              |             |             |
|---|--------------|-------------|-------------|
| 1 | 14.382971000 | 0.269245000 | 0.879607000 |
|---|--------------|-------------|-------------|

|   |              |             |             |
|---|--------------|-------------|-------------|
| 6 | 12.940240000 | 1.867360000 | 0.791914000 |
|---|--------------|-------------|-------------|

|   |              |             |             |
|---|--------------|-------------|-------------|
| 6 | 11.760670000 | 2.398526000 | 1.354916000 |
|---|--------------|-------------|-------------|

|   |              |              |             |
|---|--------------|--------------|-------------|
| 6 | 11.071658000 | -0.163843000 | 4.130794000 |
|---|--------------|--------------|-------------|

|   |              |             |             |
|---|--------------|-------------|-------------|
| 1 | 10.189720000 | 0.368523000 | 4.506715000 |
|---|--------------|-------------|-------------|

|   |              |              |             |
|---|--------------|--------------|-------------|
| 1 | 11.789365000 | -0.258851000 | 4.961241000 |
|---|--------------|--------------|-------------|

|   |              |              |             |
|---|--------------|--------------|-------------|
| 1 | 10.764860000 | -1.191066000 | 3.868783000 |
|---|--------------|--------------|-------------|

|   |              |              |             |
|---|--------------|--------------|-------------|
| 6 | 13.484658000 | -1.241755000 | 2.943571000 |
|---|--------------|--------------|-------------|

|   |              |              |             |
|---|--------------|--------------|-------------|
| 1 | 12.773820000 | -2.085769000 | 2.943366000 |
|---|--------------|--------------|-------------|

|   |              |              |             |
|---|--------------|--------------|-------------|
| 1 | 13.799623000 | -1.105221000 | 3.993154000 |
|---|--------------|--------------|-------------|

|   |              |              |             |
|---|--------------|--------------|-------------|
| 1 | 14.369789000 | -1.543195000 | 2.363377000 |
|---|--------------|--------------|-------------|

|   |              |             |              |
|---|--------------|-------------|--------------|
| 6 | 13.633649000 | 2.569117000 | -0.348775000 |
|---|--------------|-------------|--------------|

|   |              |             |              |
|---|--------------|-------------|--------------|
| 1 | 14.525286000 | 2.014861000 | -0.678478000 |
|---|--------------|-------------|--------------|

|   |              |             |              |
|---|--------------|-------------|--------------|
| 1 | 13.954819000 | 3.584469000 | -0.059019000 |
|---|--------------|-------------|--------------|

|   |              |             |              |
|---|--------------|-------------|--------------|
| 1 | 12.968416000 | 2.694564000 | -1.220133000 |
|---|--------------|-------------|--------------|

|   |              |             |              |
|---|--------------|-------------|--------------|
| 6 | 11.202175000 | 3.678380000 | 0.783030000  |
| 1 | 11.910181000 | 4.513901000 | 0.894793000  |
| 1 | 10.277969000 | 3.969433000 | 1.292721000  |
| 1 | 10.987312000 | 3.582147000 | -0.294899000 |
| 6 | 7.248680000  | 3.464156000 | 4.468158000  |
| 6 | 7.142687000  | 4.825145000 | 4.090627000  |
| 6 | 7.003651000  | 5.784071000 | 5.100588000  |
| 1 | 6.906411000  | 6.836994000 | 4.828268000  |
| 6 | 7.008748000  | 5.423388000 | 6.446902000  |
| 1 | 6.910958000  | 6.189334000 | 7.220819000  |
| 6 | 7.163615000  | 4.086314000 | 6.801199000  |
| 1 | 7.201354000  | 3.812544000 | 7.857960000  |
| 6 | 7.283486000  | 3.083582000 | 5.827591000  |
| 6 | 7.251049000  | 5.287070000 | 2.642761000  |
| 1 | 7.203224000  | 4.397430000 | 2.001387000  |
| 6 | 7.529128000  | 1.651921000 | 6.282951000  |
| 1 | 7.550620000  | 1.017541000 | 5.389087000  |
| 6 | 8.613712000  | 5.953462000 | 2.396862000  |
| 1 | 8.766894000  | 6.142711000 | 1.322129000  |
| 1 | 9.436599000  | 5.329211000 | 2.763308000  |
| 1 | 8.674040000  | 6.919108000 | 2.917619000  |
| 6 | 6.117885000  | 6.237722000 | 2.227318000  |
| 1 | 6.187408000  | 6.464035000 | 1.150931000  |
| 1 | 6.183241000  | 7.196536000 | 2.765956000  |
| 1 | 5.122627000  | 5.812463000 | 2.425400000  |

|   |             |              |              |
|---|-------------|--------------|--------------|
| 6 | 8.904800000 | 1.528642000  | 6.953285000  |
| 1 | 9.152101000 | 0.471413000  | 7.143384000  |
| 1 | 8.927084000 | 2.058751000  | 7.918310000  |
| 1 | 9.681653000 | 1.962370000  | 6.316945000  |
| 6 | 6.433328000 | 1.131699000  | 7.226206000  |
| 1 | 5.425567000 | 1.240195000  | 6.798317000  |
| 1 | 6.444835000 | 1.676912000  | 8.183661000  |
| 1 | 6.595840000 | 0.065118000  | 7.452332000  |
| 6 | 8.406051000 | 2.058812000  | 2.805109000  |
| 7 | 7.280927000 | 2.474087000  | 3.428642000  |
| 6 | 7.995916000 | 1.126720000  | 1.656020000  |
| 6 | 6.469649000 | 1.340993000  | 1.553090000  |
| 1 | 6.263150000 | 2.106420000  | 0.789364000  |
| 1 | 5.937114000 | 0.426796000  | 1.254398000  |
| 6 | 6.003034000 | 1.861433000  | 2.915479000  |
| 6 | 8.359420000 | -0.334780000 | 1.986930000  |
| 1 | 7.923241000 | -1.008570000 | 1.231498000  |
| 1 | 7.991916000 | -0.645315000 | 2.974972000  |
| 1 | 9.448497000 | -0.466704000 | 1.975169000  |
| 6 | 8.643793000 | 1.499812000  | 0.313122000  |
| 1 | 8.170057000 | 0.913094000  | -0.491713000 |
| 1 | 9.718989000 | 1.286790000  | 0.305869000  |
| 1 | 8.499321000 | 2.566623000  | 0.087356000  |
| 6 | 5.510894000 | 0.725023000  | 3.824230000  |
| 1 | 4.644427000 | 0.238355000  | 3.350177000  |

|   |             |              |             |
|---|-------------|--------------|-------------|
| 1 | 5.184886000 | 1.110635000  | 4.797826000 |
| 1 | 6.280914000 | -0.038815000 | 3.991329000 |
| 6 | 4.876910000 | 2.887282000  | 2.784016000 |
| 1 | 5.133176000 | 3.684301000  | 2.076956000 |
| 1 | 4.627374000 | 3.342243000  | 3.753729000 |
| 1 | 3.977012000 | 2.378240000  | 2.406112000 |

**Complex 6 [S=0]**

|    |              |             |              |
|----|--------------|-------------|--------------|
| 42 | 0.016275000  | 2.405298000 | 0.023490000  |
| 6  | 1.911809000  | 4.697739000 | -2.138218000 |
| 15 | 1.395484000  | 2.860010000 | -1.975774000 |
| 7  | -1.379939000 | 3.080707000 | -1.258889000 |
| 15 | -1.817276000 | 2.912690000 | 1.649789000  |
| 6  | -1.585486000 | 4.239339000 | 3.003040000  |
| 17 | 1.870423000  | 3.213166000 | 1.482769000  |
| 6  | 2.809088000  | 1.703391000 | -2.496721000 |
| 6  | -2.733561000 | 1.385952000 | 2.326508000  |
| 7  | 0.050004000  | 0.618367000 | 0.064007000  |
| 6  | -3.030439000 | 3.744676000 | 0.510413000  |
| 1  | -2.844299000 | 4.824108000 | 0.605004000  |
| 1  | -4.073845000 | 3.570042000 | 0.815197000  |
| 6  | -2.793439000 | 3.326019000 | -0.937450000 |
| 1  | -3.191725000 | 4.124885000 | -1.594247000 |
| 1  | -3.386110000 | 2.421164000 | -1.177781000 |

|   |              |             |              |
|---|--------------|-------------|--------------|
| 6 | -1.225268000 | 3.214996000 | -2.714929000 |
| 1 | -2.070995000 | 2.712569000 | -3.223962000 |
| 1 | -1.304929000 | 4.283845000 | -3.007587000 |
| 6 | 0.077075000  | 2.625755000 | -3.250784000 |
| 1 | -0.035011000 | 1.537506000 | -3.343629000 |
| 1 | 0.322339000  | 3.026202000 | -4.245522000 |
| 6 | -0.780053000 | 3.631777000 | 4.162058000  |
| 1 | -0.489003000 | 4.431730000 | 4.864218000  |
| 1 | 0.140702000  | 3.154061000 | 3.794850000  |
| 1 | -1.366974000 | 2.894850000 | 4.729797000  |
| 6 | -2.899585000 | 4.848940000 | 3.519718000  |
| 1 | -2.658440000 | 5.670711000 | 4.215891000  |
| 1 | -3.521733000 | 4.131208000 | 4.065452000  |
| 1 | -3.505942000 | 5.280979000 | 2.709151000  |
| 6 | -0.750821000 | 5.369090000 | 2.364994000  |
| 1 | -0.631431000 | 6.182217000 | 3.101336000  |
| 1 | -1.236966000 | 5.804944000 | 1.477555000  |
| 1 | 0.249015000  | 5.016237000 | 2.082948000  |
| 6 | 0.927619000  | 5.527410000 | -1.288260000 |
| 1 | 1.183866000  | 6.595984000 | -1.388588000 |
| 1 | 1.008179000  | 5.265963000 | -0.224211000 |
| 1 | -0.117038000 | 5.399538000 | -1.599165000 |
| 6 | 3.317689000  | 4.918949000 | -1.556450000 |
| 1 | 3.512352000  | 6.003855000 | -1.507231000 |
| 1 | 4.104624000  | 4.475958000 | -2.182157000 |

|   |              |              |              |
|---|--------------|--------------|--------------|
| 1 | 3.394772000  | 4.514515000  | -0.536889000 |
| 6 | 1.852930000  | 5.196150000  | -3.589985000 |
| 1 | 2.209290000  | 6.239943000  | -3.626680000 |
| 1 | 0.826117000  | 5.190254000  | -3.984332000 |
| 1 | 2.484106000  | 4.606827000  | -4.268764000 |
| 6 | -3.879962000 | 1.713319000  | 3.291640000  |
| 1 | -4.434843000 | 0.783911000  | 3.504287000  |
| 1 | -4.596363000 | 2.435546000  | 2.870975000  |
| 1 | -3.515253000 | 2.100538000  | 4.252832000  |
| 6 | -1.723341000 | 0.456689000  | 3.015899000  |
| 1 | -2.249181000 | -0.433218000 | 3.397434000  |
| 1 | -1.206397000 | 0.940245000  | 3.855311000  |
| 1 | -0.972938000 | 0.099713000  | 2.306349000  |
| 6 | -3.309540000 | 0.645070000  | 1.108963000  |
| 1 | -3.677419000 | -0.339782000 | 1.435662000  |
| 1 | -2.544500000 | 0.468524000  | 0.344341000  |
| 1 | -4.150998000 | 1.185342000  | 0.649928000  |
| 6 | 2.214912000  | 0.286950000  | -2.605374000 |
| 1 | 3.036047000  | -0.423793000 | -2.792571000 |
| 1 | 1.509835000  | 0.194522000  | -3.444070000 |
| 1 | 1.702327000  | -0.031649000 | -1.690088000 |
| 6 | 3.437739000  | 2.078751000  | -3.845920000 |
| 1 | 4.197805000  | 1.325135000  | -4.115083000 |
| 1 | 3.942524000  | 3.053916000  | -3.814321000 |
| 1 | 2.692143000  | 2.099895000  | -4.656533000 |

|    |              |              |              |
|----|--------------|--------------|--------------|
| 6  | 3.870127000  | 1.696463000  | -1.380362000 |
| 1  | 4.515291000  | 0.809516000  | -1.494508000 |
| 1  | 3.402971000  | 1.662652000  | -0.388129000 |
| 1  | 4.514873000  | 2.582095000  | -1.414558000 |
| 42 | -0.016150000 | -2.405322000 | 0.023529000  |
| 6  | -1.912226000 | -4.697581000 | -2.137953000 |
| 15 | -1.395391000 | -2.859971000 | -1.975712000 |
| 7  | 1.380088000  | -3.080734000 | -1.258830000 |
| 15 | 1.817341000  | -2.912793000 | 1.649866000  |
| 6  | 1.585465000  | -4.239542000 | 3.002990000  |
| 17 | -1.870329000 | -3.213176000 | 1.482764000  |
| 6  | -2.808719000 | -1.703054000 | -2.496711000 |
| 6  | 2.733559000  | -1.386139000 | 2.326870000  |
| 7  | -0.049852000 | -0.618387000 | 0.064014000  |
| 6  | 3.030598000  | -3.744662000 | 0.510497000  |
| 1  | 2.844577000  | -4.824113000 | 0.605095000  |
| 1  | 4.073978000  | -3.569915000 | 0.815305000  |
| 6  | 2.793584000  | -3.326051000 | -0.937383000 |
| 1  | 3.191854000  | -4.124948000 | -1.594155000 |
| 1  | 3.386270000  | -2.421218000 | -1.177753000 |
| 6  | 1.225365000  | -3.215264000 | -2.714842000 |
| 1  | 2.071091000  | -2.712948000 | -3.223985000 |
| 1  | 1.305002000  | -4.284163000 | -3.007320000 |
| 6  | -0.076971000 | -2.626088000 | -3.250782000 |
| 1  | 0.035171000  | -1.537864000 | -3.343849000 |



|   |              |              |              |
|---|--------------|--------------|--------------|
| 1 | -0.322269000 | -3.026708000 | -4.245440000 |
| 6 | 0.780135000  | -3.631983000 | 4.162083000  |
| 1 | 0.489012000  | -4.431959000 | 4.864187000  |
| 1 | -0.140575000 | -3.154132000 | 3.794941000  |
| 1 | 1.367160000  | -2.895169000 | 4.729861000  |
| 6 | 2.899520000  | -4.849305000 | 3.519581000  |
| 1 | 2.658319000  | -5.671093000 | 4.215714000  |
| 1 | 3.521756000  | -4.131660000 | 4.065336000  |
| 1 | 3.505807000  | -5.281353000 | 2.708967000  |
| 6 | 0.750645000  | -5.369140000 | 2.364866000  |
| 1 | 0.631240000  | -6.182351000 | 3.101110000  |
| 1 | 1.236670000  | -5.804924000 | 1.477328000  |
| 1 | -0.249179000 | -5.016150000 | 2.082941000  |
| 6 | -0.928062000 | -5.527479000 | -1.288188000 |
| 1 | -1.184642000 | -6.595986000 | -1.388381000 |
| 1 | -1.008287000 | -5.265941000 | -0.224134000 |
| 1 | 0.116553000  | -5.399929000 | -1.599352000 |
| 6 | -3.318024000 | -4.918400000 | -1.555841000 |
| 1 | -3.512976000 | -6.003251000 | -1.506583000 |
| 1 | -4.104995000 | -4.475186000 | -2.181348000 |
| 1 | -3.394741000 | -4.513950000 | -0.536258000 |
| 6 | -1.853849000 | -5.196043000 | -3.589720000 |
| 1 | -2.210516000 | -6.239735000 | -3.626303000 |
| 1 | -0.827136000 | -5.190447000 | -3.984324000 |
| 1 | -2.485030000 | -4.606553000 | -4.268355000 |

|   |              |              |              |
|---|--------------|--------------|--------------|
| 6 | 3.879713000  | -1.713678000 | 3.292240000  |
| 1 | 4.434620000  | -0.784333000 | 3.505090000  |
| 1 | 4.596152000  | -2.435929000 | 2.871680000  |
| 1 | 3.514751000  | -2.100949000 | 4.253317000  |
| 6 | 1.723241000  | -0.456894000 | 3.016139000  |
| 1 | 2.249053000  | 0.432916000  | 3.397935000  |
| 1 | 1.206047000  | -0.940535000 | 3.855351000  |
| 1 | 0.973048000  | -0.099760000 | 2.306452000  |
| 6 | 3.309887000  | -0.645174000 | 1.109546000  |
| 1 | 3.677766000  | 0.339607000  | 1.436459000  |
| 1 | 2.545067000  | -0.468446000 | 0.344754000  |
| 1 | 4.151410000  | -1.185471000 | 0.650666000  |
| 6 | -2.214227000 | -0.286741000 | -2.605400000 |
| 1 | -3.035205000 | 0.424186000  | -2.792594000 |
| 1 | -1.509139000 | -0.194480000 | -3.444110000 |
| 1 | -1.701548000 | 0.031756000  | -1.690132000 |
| 6 | -3.437440000 | -2.078337000 | -3.845897000 |
| 1 | -4.197352000 | -1.324578000 | -4.115094000 |
| 1 | -3.942424000 | -3.053399000 | -3.814256000 |
| 1 | -2.691846000 | -2.099673000 | -4.656507000 |
| 6 | -3.869749000 | -1.695872000 | -1.380349000 |
| 1 | -4.514949000 | -0.808980000 | -1.494730000 |
| 1 | -3.402566000 | -1.661801000 | -0.388136000 |
| 1 | -4.514460000 | -2.581542000 | -1.414269000 |

**Complex 7 [S=0]**

|    |             |              |              |
|----|-------------|--------------|--------------|
| 26 | 3.025831000 | 13.176592000 | 13.828813000 |
| 15 | 2.593737000 | 12.857012000 | 16.037804000 |
| 6  | 3.231807000 | 13.821673000 | 17.511078000 |
| 1  | 3.030040000 | 13.160051000 | 18.365534000 |
| 6  | 2.529179000 | 15.144128000 | 17.815720000 |
| 1  | 1.440141000 | 15.033574000 | 17.892574000 |
| 1  | 2.899418000 | 15.534010000 | 18.778747000 |
| 1  | 2.744632000 | 15.904755000 | 17.055813000 |
| 6  | 4.746763000 | 14.020024000 | 17.400331000 |
| 1  | 5.287002000 | 13.085212000 | 17.192125000 |
| 1  | 4.990960000 | 14.726130000 | 16.593516000 |
| 1  | 5.146102000 | 14.434792000 | 18.340491000 |
| 6  | 3.295840000 | 11.148403000 | 16.440164000 |
| 1  | 4.347686000 | 11.209459000 | 16.114361000 |
| 6  | 3.269784000 | 10.749362000 | 17.919671000 |
| 1  | 3.913469000 | 11.374630000 | 18.553235000 |
| 1  | 2.245885000 | 10.779622000 | 18.323434000 |
| 1  | 3.626861000 | 9.711248000  | 18.021034000 |
| 6  | 2.596311000 | 10.070410000 | 15.611657000 |
| 1  | 2.648636000 | 10.261324000 | 14.536508000 |
| 1  | 3.060689000 | 9.089522000  | 15.802587000 |
| 1  | 1.530585000 | 10.002062000 | 15.872763000 |
| 15 | 2.338121000 | 15.193331000 | 13.303124000 |

|    |              |              |              |
|----|--------------|--------------|--------------|
| 6  | 3.516214000  | 16.221503000 | 12.275665000 |
| 1  | 2.937185000  | 17.111395000 | 11.986955000 |
| 6  | 4.732893000  | 16.680426000 | 13.088657000 |
| 1  | 4.459318000  | 17.149679000 | 14.044413000 |
| 1  | 5.401805000  | 15.839987000 | 13.313728000 |
| 1  | 5.314827000  | 17.419367000 | 12.512905000 |
| 6  | 3.953937000  | 15.526783000 | 10.990607000 |
| 1  | 3.092329000  | 15.228727000 | 10.379720000 |
| 1  | 4.579231000  | 16.204536000 | 10.385701000 |
| 1  | 4.551427000  | 14.631612000 | 11.210369000 |
| 6  | 1.830516000  | 16.480517000 | 14.580171000 |
| 1  | 2.657177000  | 16.469625000 | 15.307381000 |
| 6  | 1.677323000  | 17.913655000 | 14.050883000 |
| 1  | 2.607393000  | 18.345971000 | 13.659656000 |
| 1  | 0.909723000  | 17.966953000 | 13.263796000 |
| 1  | 1.339253000  | 18.564144000 | 14.874474000 |
| 6  | 0.535147000  | 16.081509000 | 15.288575000 |
| 1  | 0.579215000  | 15.082120000 | 15.722909000 |
| 1  | 0.314061000  | 16.796238000 | 16.097238000 |
| 1  | -0.309862000 | 16.091050000 | 14.584605000 |
| 15 | 3.171041000  | 12.077901000 | 11.762021000 |
| 7  | 4.817612000  | 13.420311000 | 14.093530000 |
| 7  | 5.898394000  | 13.614473000 | 14.284832000 |
| 6  | 0.149867000  | 13.839389000 | 12.574875000 |
| 6  | -1.052114000 | 13.608623000 | 11.882205000 |

|   |              |              |              |
|---|--------------|--------------|--------------|
| 1 | -1.584793000 | 12.665227000 | 12.032953000 |
| 6 | 1.906462000  | 10.847633000 | 12.194481000 |
| 5 | 0.814795000  | 12.813996000 | 13.631978000 |
| 6 | 2.883304000  | 12.433879000 | 9.928446000  |
| 1 | 3.599888000  | 13.232674000 | 9.689264000  |
| 6 | 0.882950000  | 11.292541000 | 13.072979000 |
| 6 | 4.757351000  | 11.086266000 | 11.658643000 |
| 1 | 4.583068000  | 10.311642000 | 10.898399000 |
| 6 | -0.074802000 | 10.325550000 | 13.457726000 |
| 1 | -0.869153000 | 10.615437000 | 14.147216000 |
| 6 | 5.913765000  | 11.967586000 | 11.170674000 |
| 1 | 5.720198000  | 12.391104000 | 10.173970000 |
| 1 | 6.109510000  | 12.802236000 | 11.857419000 |
| 1 | 6.840488000  | 11.374120000 | 11.102147000 |
| 6 | -1.558145000 | 14.537783000 | 10.968230000 |
| 1 | -2.486757000 | 14.326126000 | 10.430399000 |
| 6 | -0.034863000 | 9.010504000  | 13.000159000 |
| 1 | -0.801838000 | 8.299021000  | 13.319643000 |
| 6 | 5.096589000  | 10.351765000 | 12.958455000 |
| 1 | 5.240961000  | 11.035981000 | 13.804197000 |
| 1 | 4.311002000  | 9.636314000  | 13.233424000 |
| 1 | 6.035336000  | 9.787653000  | 12.830780000 |
| 6 | 1.960657000  | 9.512537000  | 11.750377000 |
| 1 | 2.776304000  | 9.179561000  | 11.106377000 |
| 6 | 0.994249000  | 8.591882000  | 12.146577000 |

|   |              |              |              |
|---|--------------|--------------|--------------|
| 1 | 1.044473000  | 7.556338000  | 11.800773000 |
| 6 | 0.324573000  | 15.990636000 | 11.396806000 |
| 1 | 0.872661000  | 16.911580000 | 11.185596000 |
| 6 | -0.869838000 | 15.731434000 | 10.719839000 |
| 1 | -1.256095000 | 16.450539000 | 9.992854000  |
| 6 | 0.804768000  | 12.728474000 | 16.279264000 |
| 6 | 0.063952000  | 12.828105000 | 15.078279000 |
| 6 | 0.823587000  | 15.049726000 | 12.309209000 |
| 6 | 1.467912000  | 12.951337000 | 9.672498000  |
| 1 | 1.329931000  | 13.134810000 | 8.594541000  |
| 1 | 0.715833000  | 12.214286000 | 9.988485000  |
| 1 | 1.257464000  | 13.882382000 | 10.204425000 |
| 6 | -1.337095000 | 12.890621000 | 15.211254000 |
| 1 | -1.952246000 | 13.007524000 | 14.316422000 |
| 6 | 3.165760000  | 11.249791000 | 8.993757000  |
| 1 | 2.954579000  | 11.557915000 | 7.956565000  |
| 1 | 4.207945000  | 10.904508000 | 9.020353000  |
| 1 | 2.508895000  | 10.395734000 | 9.215348000  |
| 6 | 0.179029000  | 12.650224000 | 17.534327000 |
| 1 | 0.775031000  | 12.585382000 | 18.447685000 |
| 6 | -1.968107000 | 12.827299000 | 16.456175000 |
| 1 | -3.058866000 | 12.887141000 | 16.517161000 |
| 6 | -1.212183000 | 12.693569000 | 17.626672000 |
| 1 | -1.702366000 | 12.643913000 | 18.602253000 |
